# Supplementary material for: E2F1-induced autocrine IL-6 inflammatory loop mediates cancer-immune crosstalk that predicts T cell phenotype switching and therapeutic responsiveness
Source: PubMed Central journal article supplement (PMC11560763; doi:10.3389/fimmu.2024.1470368), 2024-10-31
Supplement: DataSheet1.pdf [file DataSheet1.pdf]

Supplementary Material

1 Supplementary Figure

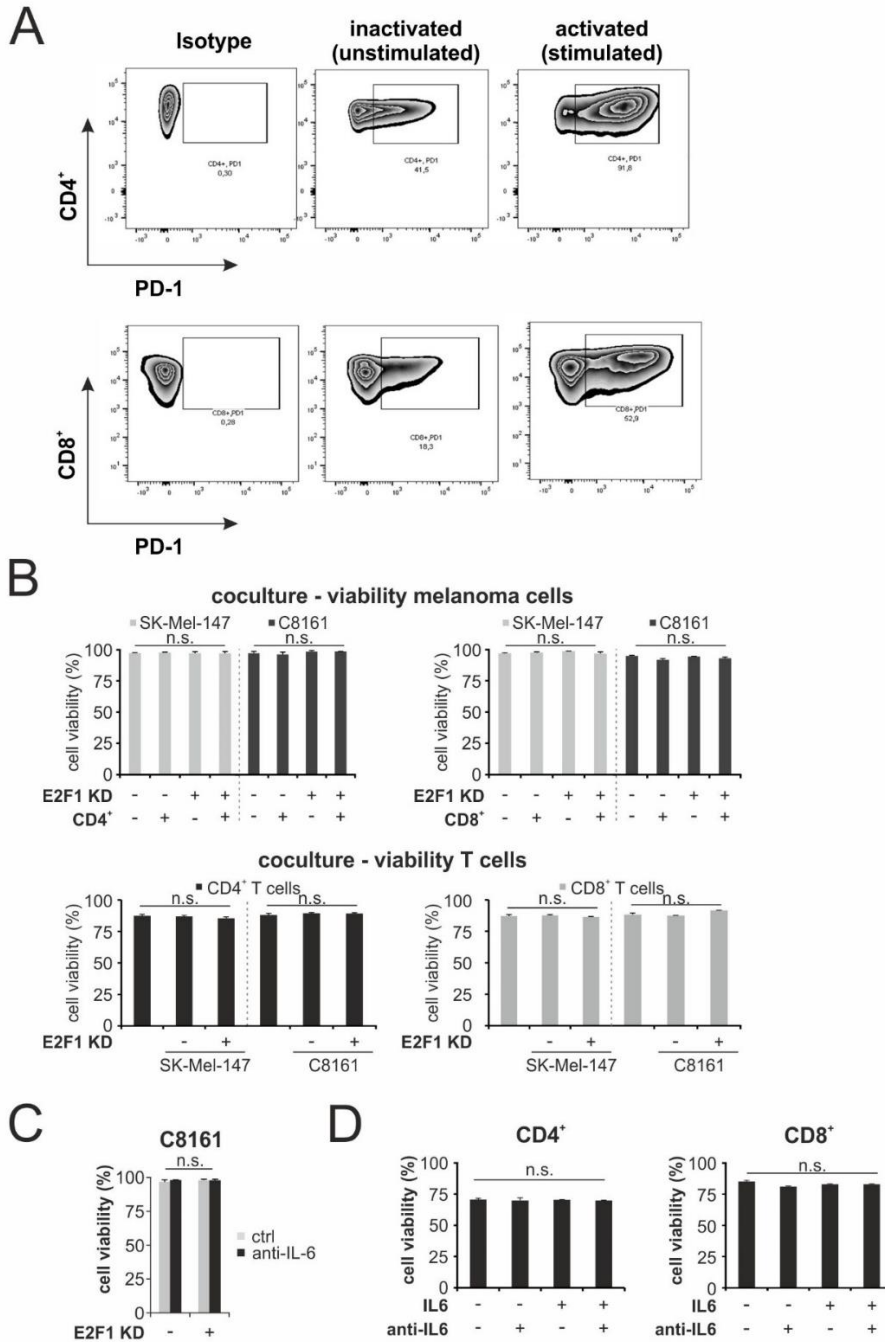

**Supplementary Figure S1.** Activity and viability of melanoma and selected T cells. **(A)** Flow cytometry analysis of PD1 expression in CD4<sup>+</sup> and CD8<sup>+</sup> T cells before and after PHA activation. **(B)**

Cell viability assays of cocultured melanoma and T cells. **(C, D)** Cell viability assays of melanoma **(C)** and T cells **(D)** in the presence or absence of anti-IL-6.
